# Supplementary material for: Gene regulation analysis of patient-derived iPSCs and its CRISPR-corrected control provides a new tool for studying perturbations of ELMOD3 c.512A>G mutation during the development of inherited hearing loss
Source: PubMed Central journal article supplement (PMC10501637; doi:10.1371/journal.pone.0288640), 2023-09-14
Supplement: pone.0288640.s007.pdf [file pone.0288640.s007.pdf]

**S3 Table 16 off-target sequences**

| Number | Location       | Number of mismatches | Sequence (including mismatches) |
|--------|----------------|----------------------|---------------------------------|
| 1      | chr1:76778989  | 3                    | CCTTGtACTGGaTCcTGGCTATC         |
| 2      | chr12:72840610 | 3                    | GAaAGCCAAaACCCAGTGtAAGG         |
| 3      | chr17:47279226 | 3                    | CCTTcCcCTGGGTCTTGGCTATt         |
| 4      | chr19:48962683 | 3                    | CCATGctCTGGGTCTTtGCTtTC         |
| 5      | chr2:20145935  | 3                    | GAcAGCCAAGtCCCAGgGCAAGG         |
| 6      | chr3:126518620 | 3                    | GtTAGgCAAGcCCCAGTGCAGGG         |
| 7      | chr4:115610029 | 3                    | CCCTGtACTaGGTCTTGGgTATC         |
| 8      | chr6:41504224  | 3                    | CCCTGCcCTGGGTCTTgaCTAaC         |
| 9      | chr6:151647618 | 3                    | CCTTGCACTGGGgtTTGGCTtTC         |
| 10     | chrX:83233585  | 3                    | GAaAGgCAAaACCCAGTGCAAGG         |
| 11     | chrX:85759761  | 3                    | CCTTGCACTGGGTtTTGcCTtTC         |
| 12     | chr12:24306685 | 3                    | GATAGCCAAaACCCAGaGaGGGG         |
| 13     | chr16:1534223  | 3                    | CCGCGgACTGGGaCTTGGCTtTC         |
| 14     | chr16:65626450 | 3                    | GATgGCCAAcACCCAGTGaGGGG         |
| 15     | chr3:184456679 | 3                    | CCACtCACTGGGTCTTGGCTcTa         |
| 16     | chr8:19249682  | 3                    | GATAGCaAtGACCCAGTGaGTGG         |
